# Supplementary material for: Laser ablation split stream for in situ sulfur isotope and elemental analysis
Source: Royal Society of Chemistry journal article supplement (doi:10.1039/d1ja00083g), 2021-01-01
Supplement: d1ja00083g1.csv [file d1ja00083g1.csv]

name	S34_ppm_mean	Mn55_ppm_mean	Fe57_ppm_mean	Co59_ppm_mean	Ni60_ppm_mean	Cu65_ppm_mean	Zn66_ppm_mean	Ga71_ppm_mean	Ag107_ppm_mean	Cd111_ppm_mean	In115_ppm_mean	Sn118_ppm_mean	Sb121_ppm_mean	Pb208_ppm_mean	Bi209_ppm_mean	S34_ppm_LOD_Howell	Mn55_ppm_LOD_Howell	Fe57_ppm_LOD_Howell	Co59_ppm_LOD_Howell	Ni60_ppm_LOD_Howell	Cu65_ppm_LOD_Howell	Zn66_ppm_LOD_Howell	Ga71_ppm_LOD_Howell	Ag107_ppm_LOD_Howell	Cd111_ppm_LOD_Howell	In115_ppm_LOD_Howell	Sn118_ppm_LOD_Howell	Sb121_ppm_LOD_Howell	Pb208_ppm_LOD_Howell	Bi209_ppm_LOD_Howell	name2	session
GBW07267_1	288426.7071	19.99957836	460800	7.010519621	NA	203.3863099	44.72937362	1.110944575	108.7375151	NA	NA	2.152670406	NA	4.242937672	1.091967894	1128.979878	1.877571504	98.68429344	1.84639711	6.499834259	2.759324048	4.854308313	0.041793057	-0.02527664	NA	NA	0.288002712	NA	0.017682104	0.010239255	GBW07267	session-1
GBW07267_2	287985.6182	11.1255114	460800	NA	NA	214.3866712	19.46517166	NA	70.46627346	NA	NA	1.515149388	NA	3.162335419	1.226201021	972.5402917	0.723230557	86.01161887	2.266598019	5.63030522	2.40475711	4.057679217	0.037928996	-0.021925983	NA	NA	0.263371487	NA	0.014866945	0.010088317	GBW07267	session-1
GBW07267_3	294500.0132	11.54675269	460800	NA	29.8830312	224.5545008	45.04706852	NA	116.0853716	NA	NA	NA	NA	7.800736755	3.302017469	931.5967509	0.84243113	59.30686353	2.484314602	3.051284368	5.519606012	4.281789031	0.600013669	-0.02328861	NA	NA	0.575024282	NA	0.015967648	0.00983152	GBW07267	session-1
GBW07267_4	288662.6021	15.19196602	460800	NA	26.57105266	379.5440716	31.33779461	NA	134.0281612	NA	NA	NA	0.849065178	7.29571542	3.476371467	815.1256199	1.228659841	68.32392148	1.799109343	3.272031446	2.575800042	4.437569759	0.035773605	-0.022214497	NA	NA	0.531103542	0.028979413	0.014646698	0.009887224	GBW07267	session-1
GBW07267_5	295101.702	43.26652253	460800	NA	31.42253644	183.9059449	79.7530712	1.300337509	136.9499012	NA	NA	1.33738179	NA	4.492265765	1.230784326	768.5694948	0.835600149	72.43753123	1.928879281	6.48807018	5.38361482	4.906788983	0.039033753	-0.173363905	NA	NA	0.040376134	NA	0.015068907	0.009289439	GBW07267	session-1
GBW07268_1	200505.5284	19.5457344	273068.182	37.89356245	21.59910488	333000	4244.897004	NA	NA	30.94193608	43.40298835	6.583436601	NA	29.3831488	5.971797775	1315.422588	1.956838448	70.82134401	2.58157826	4.823547391	19.50855018	6.26253892	0.060502086	-0.475140649	0.467076987	0.01393487	0.709839884	NA	0.0233412	0.015023719	GBW07268	session-1
GBW07268_2	191289.2459	17.20078754	265471.3753	26.60358062	21.09153532	333000	1012.80566	NA	NA	12.92722744	45.10015726	5.677664529	NA	31.41151962	3.440419092	1036.230577	1.787174738	102.0085371	3.43786512	4.747398089	37.77980049	6.421985097	0.314450059	-0.464532255	0.390281628	0.013888526	0.816240124	NA	0.020612262	0.014838008	GBW07268	session-1
GBW07268_3	191698.4076	11.118481	260917.3345	38.10320461	29.59505627	333000	671.7943639	0.947308599	NA	NA	50.51176992	5.280328148	NA	41.65040609	4.528836582	1259.825578	1.793614417	64.84987932	2.514164987	4.027093735	39.20414827	6.508499436	0.051485488	-0.455788554	NA	0.012808943	0.759117712	NA	0.021675291	0.015191581	GBW07268	session-1
GBW07268_4	186657.3052	14.57934114	253378.2736	31.29112403	25.65727705	333000	853.8963452	NA	NA	NA	50.23820009	6.136325068	NA	28.2527271	3.927279068	1197.721778	1.172832379	63.99615912	2.307373467	3.778281143	22.81414999	6.333404011	0.048966459	-0.461744701	NA	0.012739571	0.882178704	NA	0.020800786	0.013173709	GBW07268	session-1
GBW07268_5	187071.0368	11.68115453	248657.1329	32.32892328	26.79934591	333000	1421.977924	1.438347023	NA	12.82502898	47.02415889	4.459973033	NA	28.72550426	3.602342586	1066.257786	2.123890406	93.17744629	2.973878265	4.277718199	29.11090308	5.814593121	0.043413971	-0.250735006	0.387196188	0.012670182	0.961774904	NA	0.019706659	0.01359426	GBW07268	session-1
GBW07268_6	196286.9143	98.58058499	270687.3599	31.95544315	34.89265797	333000	1019.817371	NA	NA	13.06373007	42.25964904	4.446747999	NA	49.66519818	5.795793453	1738.836022	1.123079571	71.10098669	2.824142677	4.811455675	31.71254509	6.284748962	0.059256807	-0.4806662	0.394402733	0.013862854	0.95892298	NA	0.02039443	0.014580931	GBW07268	session-1
GBW07270_1	199717.1306	142.7299206	19481.52521	457.68604	NA	231.9808273	613690	144.2793599	72.42145341	1768.976113	10.71098615	4.297035734	5.531014626	26.98426998	1.16918953	1311.455328	1.049104909	57.65469305	2.235502899	3.625018936	3.226866801	80.50379053	0.050050194	-0.399124504	0.355831597	0.011547746	0.617755073	0.041745755	0.018942704	0.017649236	GBW07270	session-1
GBW07270_2	201257.5625	99.06023488	16656.09755	449.1318837	NA	313.3364481	613690	241.962341	124.4858536	1336.921248	7.055145086	NA	4.081162056	15.65876905	0.410380964	1288.953685	1.000321256	71.45566747	2.999103723	2.920394519	3.050138446	78.64187557	0.051779571	-0.410833781	0.353897379	0.011832503	1.078061938	0.041070674	0.01969605	0.012389675	GBW07270	session-1
GBW07270_3	201266.0234	153.4516882	22365.56043	540.0711803	NA	265.9747989	613690	186.6089278	112.9148966	1450.204845	33.93562551	6.08062992	7.655089397	24.80464646	0.78892364	737.6858928	1.497485073	82.56872474	2.908155233	4.201395619	6.314582239	68.92913537	0.051195705	-0.029265754	0.352912189	0.012265881	0.657221255	0.03851794	0.019198846	0.011909018	GBW07270	session-1
GBW07270_4	197725.3291	112.3244888	17472.63086	413.0211961	NA	215.6461161	613690	179.4346531	179.3492278	1411.007838	8.936158434	3.729363639	12.48239657	39.41364501	0.415177622	1075.965769	1.987521262	56.41318705	2.163552036	9.203861816	6.59424266	82.99696121	0.050155515	-0.02850442	0.351891083	0.011728906	0.0444478	0.041871092	0.019663488	0.01253449	GBW07270	session-1
GBW07270_5	196639.5268	110.4290648	19260.55883	479.4979444	NA	430.9129685	613690	304.3296545	123.7871059	1265.595875	13.77638938	3.261841246	11.69096276	38.2030232	0.406341782	955.1095073	1.030237524	60.62963636	2.179976728	6.841407348	6.596983141	47.46762666	0.728962284	-0.40845934	0.34100196	0.011551671	0.041172505	0.039216297	0.018016939	0.01226773	GBW07270	session-1
GBW07270_6	202070.959	122.2485961	18229.37438	413.3127233	NA	321.852458	613690	268.5246461	158.1528106	1457.777503	8.316254719	3.701517426	7.519005496	23.48643952	0.484639581	1049.560427	1.642530824	59.7693082	1.383732935	6.513100161	6.604223294	73.57420002	0.689125507	-0.423428753	0.35475502	0.01255271	0.053948684	0.045400033	0.018178552	0.014631593	GBW07270	session-1
022-7267	342158.0614	35.37674296	460800	10.00449775	38.95895432	389.8380365	7476.53515	1.952191606	41.0921245	30.90418614	0.188109078	3.895614968	2.406362772	26.05821992	1.8108306	953.8706157	0.706796456	63.27337435	0.614849654	6.13576626	1.268499174	3.578126821	0.031675771	-0.309324199	0.222861529	0.006104446	0.353149437	0.019522363	0.010567055	0.006529169	GBW07267	session-2
024-7267	383396.017	35.84793293	460800	12.17824128	52.80759776	448.5746191	8763.321011	2.861996785	144.6879356	33.34951643	0.217920849	4.26537702	1.860268595	26.7469643	3.001393353	1759.959909	0.75912932	80.5353827	0.992678925	7.572954857	2.004398407	3.608095987	0.031155284	-0.222734594	0.363038024	0.007116822	0.556326148	0.030376045	0.016794607	0.009801546	GBW07267	session-2
026-7267	376692.1018	33.14756316	460800	11.86736022	29.86127441	388.5013864	9195.572854	2.542722158	146.0420335	30.57509331	0.310000467	2.309149675	2.097479867	32.93272253	2.232512781	2076.713021	1.529088861	84.73372363	1.99638637	7.913588548	1.998463197	3.713047574	0.041275626	-0.247467418	0.330879266	0.010064422	0.608399996	0.034048075	0.018430075	0.010354091	GBW07267	session-2
076-7267	369730.1947	41.45327372	460800	10.58777667	62.82733063	340.1351057	8017.829245	2.332262469	140.3948765	31.6103245	NA	4.703642961	1.983644127	30.04504547	2.177160888	1436.537713	1.00800047	80.41617022	1.685265326	6.037150295	1.766251929	3.158939919	0.033290635	-0.258891131	0.300801925	NA	0.482257005	0.028314469	0.014785031	0.008878885	GBW07267	session-2
078-7267	362056.5139	34.30910013	460800	8.614986882	52.41178187	318.4403981	8398.299071	2.456979471	91.62029058	30.23054293	0.255446044	3.391744179	1.94598375	29.10278998	2.17405154	1273.637363	0.902434213	68.15119155	1.659610044	5.751002844	1.625677061	2.941950251	0.034982151	-0.192229628	0.344333968	0.007274043	0.419675822	0.027706661	0.014042957	0.008843783	GBW07267	session-2
080-7267	371478.6805	44.41479452	460800	101.3365689	72.71497541	446.1349715	8654.868344	2.419600251	NA	37.97371258	0.279310831	5.966022225	2.011696991	34.85726855	2.63978983	856.5842365	0.916529442	105.7261958	2.488418011	5.745212904	1.74646516	3.080703907	0.034196469	-0.240231525	0.357789598	0.007895091	0.485692659	0.028431529	0.014485631	0.009326884	GBW07267	session-2
028-7268	278187.3604	13.82996154	288633.2366	29.99832489	31.48464106	333000	1141.775545	NA	NA	12.53033386	55.22103054	11.61277999	NA	34.2094146	6.463588175	1350.774445	0.921756553	67.14795945	1.307293307	5.48206043	32.79458498	3.051692469	NA	-0.214943637	0.353339658	0.008456651	0.45872684	NA	0.014837162	0.00911256	GBW07268	session-2
030-7268	272705.9634	57.0138113	302109.2536	43.76874784	23.6384003	333000	3725.063156	NA	NA	40.95326496	54.44915518	10.41913559	NA	62.72687912	6.367609603	1382.685601	0.662094541	79.02354698	1.661063603	4.031638217	22.2693636	3.14971571	NA	-0.443664745	0.386800781	0.008288582	0.471088966	NA	0.014155237	0.00949544	GBW07268	session-2
032-7268	276933.3326	23.01036087	297176.5536	43.02258821	28.15129584	333000	1658.764915	NA	NA	19.23461723	52.77174976	11.16300445	0.722206258	68.43789713	5.867386317	1269.160158	1.022594822	51.18247134	1.301956199	6.901260081	36.94806468	3.102441384	NA	-0.442112058	0.563520605	0.008004547	0.488935473	0.021158628	0.015297685	0.009046614	GBW07268	session-2
070-7268	287523.4689	40.06122084	306131.4919	61.68190925	34.15613199	333000	3869.041299	NA	NA	35.05424481	57.6679338	10.27739641	0.955265556	136.5383861	9.222158212	1057.413488	1.20796443	87.45338239	1.064584212	5.89807484	38.24213261	4.502208988	NA	-0.211440404	0.331900897	0.008569656	0.439937997	0.027134177	0.01445601	0.008449116	GBW07268	session-2
074-7268	279751.8067	27.00924018	288017.7951	42.67618715	35.30572841	333000	2440.540304	NA	NA	12.4525122	52.86414535	12.88283918	1.007723514	78.42242549	5.6196931	1488.300567	1.026274074	70.26249415	0.88039322	5.845599536	29.04118067	3.62995995	NA	-0.246781545	0.352842195	0.008652463	0.515168589	0.028553867	0.016093358	0.009366114	GBW07268	session-2
034-7270	220485.4074	195.2447472	20242.93023	415.2700605	NA	1211.625513	613690	170.3172624	62.81569003	1961.0642	13.78224542	8.902425423	66.27076826	1005.647675	12.40747612	1289.093045	1.585259195	66.09312326	1.253782685	4.792189396	4.134384867	24.07887781	0.036110783	-0.298066992	0.381646845	0.009456646	0.497495553	0.026694048	0.015610558	0.009081054	GBW07270	session-2
036-7270	230333.3979	308.2224704	19757.70691	414.7041451	NA	991.1024128	613690	174.6815739	132.2934483	1898.340251	14.03397097	10.14510787	91.26817852	992.0211095	11.87448909	1226.982827	1.273238809	37.87111645	1.149013985	10.45560694	1.810374156	20.44634856	0.035119789	-0.116624139	0.357573122	0.009626632	0.275874103	0.032633213	0.01714808	0.010572192	GBW07270	session-2
038-7270	233471.8711	222.7957232	20103.43137	411.1694435	NA	1235.624539	613690	171.4570547	84.92728351	1942.451502	13.27716788	11.8145809	71.24910919	928.9829233	11.42287376	2459.551062	1.423636105	45.65626481	1.31648651	5.820018223	1.829380146	23.11748314	0.034265388	-0.361587377	0.334905864	0.008486789	0.545647544	0.030524863	0.016036898	0.009683033	GBW07270	session-2
064-7270	226662.4142	212.1943416	19756.69837	392.6060376	NA	1274.999225	613690	170.3403862	84.9562153	1948.438947	13.31924509	13.08982456	78.49290253	947.5385476	11.93053598	1536.533563	0.546095105	79.38759164	2.279229478	6.34762903	1.969972149	21.20225924	0.035636419	-0.236917208	0.36146309	0.009558849	0.558714456	0.033201143	0.017106253	0.010655666	GBW07270	session-2
066-7270	236680.621	210.0125781	20028.27086	412.7829805	NA	1089.334093	613690	172.3721385	128.5177234	1972.267642	15.15255028	12.76055062	84.8317563	984.0176874	11.34250756	1934.922111	0.74381244	72.07514411	1.895240176	6.631910563	2.056007495	37.07618665	0.036191506	-0.248197013	0.381538551	0.009776706	0.586597959	0.032372825	0.017341777	0.010723159	GBW07270	session-2
068-7270	230071.9498	211.3691961	19498.00009	399.2314243	NA	1114.822235	613690	170.0845316	108.8340242	1992.234426	12.92296818	13.7441208	75.18227394	1027.172373	13.30664016	1407.072777	0.519877431	58.72789997	1.866853964	6.304778556	1.865547294	19.15352706	0.035046279	-0.366717156	0.361422532	0.009640067	0.559096626	0.032809551	0.015871008	0.010300931	GBW07270	session-2
031-7267	336765.9261	29.78491673	460800	16.4954666	31.92407597	290.1587125	NA	NA	38.77462218	44.56732934	NA	2.256234332	2.462896929	21.37928353	1.917195279	2622.126534	3.149232891	102.2521739	2.409054385	4.318568359	4.783334475	12.51609906	0.809491015	1.482639885	0.631405582	0.151622878	0.519941988	0.03489249	0.012360533	0.00905378	GBW07267	session-3
033-7267	342747.8051	29.71408371	460800	11.86442389	17.97853376	242.8417562	NA	NA	30.61238359	44.8014922	NA	2.1253264	2.202164699	25.3464461	2.006908502	2468.939128	2.243173271	107.3297757	2.608646301	4.201784639	3.350666399	6.883545424	0.962803728	0.969179658	0.628714599	0.160521467	0.447945842	0.061807478	0.012477791	0.008665575	GBW07267	session-3
035-7267	328254.3034	37.77001848	460800	27.96017281	31.40390661	235.7157545	NA	3.204129866	77.02234708	46.14414232	NA	2.676610288	2.293632242	22.98374492	1.96352117	1741.121849	2.430454161	104.2588501	2.945108764	5.205354428	3.73009026	7.053621839	0.827240345	0.961585411	0.655356159	0.321071888	0.429172771	0.03257501	0.01208725	0.007967456	GBW07267	session-3
090-7267	253702.186	30.67533609	460800	22.77992987	17.65911787	172.1948545	NA	NA	42.98065472	155.8144386	NA	1.61739391	1.343913422	21.79515718	1.294399218	1336.034242	2.652790439	67.46492847	2.610279884	2.441876507	3.344329552	7.272300347	0.668141572	1.015470917	2.191695827	0.134962208	0.216668325	0.037807295	0.010049171	0.004045909	GBW07267	session-3
092-7267	271222.8888	22.78014261	460800	12.23585452	13.02586241	193.2343369	NA	NA	11.86059816	128.7318111	0.360760658	1.701849106	1.049160148	22.21101539	1.347330314	1271.344246	2.302510976	124.3099061	3.487489368	2.754346732	3.92350034	4.219759342	0.704769548	1.185185757	1.810749862	-240.1919522	0.015958568	0.029515225	0.011568762	0.005414644	GBW07267	session-3
037-7268	800093.6304	92.00714212	428743.7389	100.2669046	17.8066992	333000	NA	0.777307976	912.4411817	NA	105.231552	14.17015601	3.717817637	389.6608555	14.51695055	4335.008855	5.803215755	130.3353042	4.765582363	3.246874479	10.50386641	51.75280605	-4.791888151	1.136487382	-3.298617298	0.254602724	0.960430503	0.104590537	0.027023007	0.012374002	GBW07268	session-3
039-7268	830650.5236	76.09419623	436004.1136	95.89301692	23.07074822	333000	NA	NA	902.9560664	NA	110.6731549	17.11904769	3.715815833	338.6149261	16.82261596	8627.289333	4.354551366	132.5038652	3.980008857	3.268027925	7.885363334	57.59306982	-3.157201767	1.688119548	-2.135366613	0.2645784	1.022266623	0.104534223	0.028916408	0.012132973	GBW07268	session-3
041-7268	927111.4048	91.79077974	453273.554	100.1271142	12.80009463	333000	NA	0.330829461	947.8718629	NA	114.2872226	17.0835714	3.679344202	218.8891401	14.22029306	5313.605502	5.883012603	174.5992414	3.280253594	3.327691219	5.499500919	111.6662943	-2.462759222	1.170450338	-1.65051349	0.278189189	0.060222867	0.103508194	0.025421094	0.012121136	GBW07268	session-3
082-7268	961944.6678	60.62782566	884491.0941	106.6241507	22.40883352	333000	NA	NA	2244.791634	NA	130.6211184	5.492307203	2.052667563	152.0076881	7.96346634	4290.863723	2.914603449	209.6679342	3.888820931	4.271605387	6.283864136	13.48443375	-3.683745376	2.534192101	-0.910620147	0.272493828	0.294299797	0.028872953	0.011295947	0.006399991	GBW07268	session-3
084-7268	862180.1702	92.2610206	812872.0506	81.30039824	NA	333000	NA	NA	2295.464838	NA	121.9106875	6.019866398	2.15144509	319.0152223	9.592214994	4993.80603	3.594689446	216.7391775	3.561698622	4.139017952	6.383452626	11.85709689	-7.330964343	1.25242424	-1.910400426	0.264640926	0.268803647	0.06052497	0.011455329	0.00674521	GBW07268	session-3
086-7268	784484.4452	66.78648894	777524.8024	92.92927819	25.72701613	333000	NA	10.35966227	2194.064538	NA	119.3255656	5.792763698	1.076710551	118.18835	8.478891091	3743.416315	2.846388421	154.5168106	3.92114275	3.407017729	6.027165464	10.12668678	-56.12403876	2.405438783	-1.526388569	0.237213378	0.258662788	0.03029028	0.010817047	0.006445834	GBW07268	session-3
043-7270	164901.6629	211.265017	14478.07044	281.4900306	NA	722.3457697	613690	141.6357818	7.718158151	1840.891059	15.02532887	6.3016711	66.25708865	805.2169343	16.51479979	1117.975957	1.664102314	37.42315181	1.602912484	1.626744413	1.853835652	9.048742424	0.369848263	0.397665073	0.287649923	0.102910834	0.022645384	0.023527748	0.005684859	0.005277742	GBW07270	session-3
045-7270	162648.2731	190.6428778	14655.72896	276.5575979	NA	709.0520956	613690	144.0154872	5.757759329	1845.929467	12.47688169	6.168655191	91.5824675	653.9523418	11.57862787	969.4567388	2.516576286	43.86893782	1.445228573	1.69129153	1.779664889	6.166684292	0.410339268	0.608602994	0.280496811	0.102318288	0.348314143	0.024644529	0.005691757	0.00500999	GBW07270	session-3
047-7270	164753.7606	249.0700191	14492.39376	284.9263347	13.20785199	664.0556739	613690	148.3594164	3.812282767	1843.33477	12.35885281	4.818999912	73.33314579	531.262904	8.681971577	1134.104964	2.407176866	45.19188765	1.173644422	1.892870469	1.949054383	6.512532653	0.424834558	0.584611951	0.300709307	0.113963902	0.35070912	0.025088361	0.005315662	0.004834526	GBW07270	session-3
076-7270	190851.2599	259.5232358	16030.3706	302.5663549	NA	631.9260661	613690	280.8660704	4.752638329	1874.563749	10.42259726	4.677400911	93.46437826	473.2116165	7.58595043	791.0497791	2.498762714	59.17448703	1.791438919	1.403352327	1.820372449	6.113876626	0.799334392	0.541276088	0.288461535	0.086085759	0.281753888	0.030429932	0.005346493	0.004385853	GBW07270	session-3
078-7270	198285.301	259.729523	16468.80488	318.4837512	NA	631.9334983	613690	309.0213292	6.764211324	1881.53169	9.625461869	3.695254209	78.8380409	526.1221567	9.231978855	1104.684339	2.585950192	58.78797128	1.528307747	1.666812568	1.829420873	5.992190835	0.828154084	0.460882077	0.28590672	0.072974225	0.248315255	0.028425738	0.005402439	0.004678552	GBW07270	session-3
080-7270	198103.3821	357.0530578	16643.85312	320.9159805	NA	617.6839355	613690	301.1794847	5.712345747	1894.993767	10.22311151	4.258825503	93.1442963	579.0247581	8.969217743	959.7647809	3.231062083	60.06937305	1.845349804	1.704011745	2.621803522	5.838316497	0.835266177	0.648108439	0.277278258	0.078063784	0.246293428	0.028992258	0.005246576	0.004306509	GBW07270	session-3
022-7267	361085.8903	40.72655121	460800	NA	61.46091436	418.5030935	190.3393806	NA	6.214711844	NA	0.242240926	3.099507566	NA	11.14386965	1.684928978	2417.298133	2.659824367	126.1868458	4.708975498	11.57390284	5.170478682	4.954942215	0.764967558	0.862721013	NA	0.0116913	0.565474419	0.044658452	0.01785721	0.012150552	GBW07267	session-4
024-7267	377658.0302	34.97220973	460800	NA	47.46964128	360.8892852	167.1576556	NA	NA	NA	NA	5.276740069	NA	8.12051926	1.718469429	2415.788247	1.788650239	157.2821735	4.186892132	8.161420888	5.243531174	9.180182308	0.865387202	1.050384054	NA	0.168512889	0.577267509	0.043722706	0.018017695	0.012392423	GBW07267	session-4
026-7267	363617.281	32.59247111	460800	NA	32.26525532	292.6200703	150.138275	2.157997559	NA	NA	0.298935116	3.419970379	1.341657924	6.668158837	1.294133713	2676.971113	2.225992843	206.9153974	5.333002719	8.287165626	5.627484868	4.367079702	0.34649803	2.629131358	NA	0.011818218	0.487946115	0.038700932	0.017485397	0.012443256	GBW07267	session-4
028-7267	362117.7348	29.77456873	460800	NA	NA	189.8645721	148.3592944	NA	NA	NA	NA	2.565160817	1.360551487	5.606778744	1.494804995	2325.222627	3.778367008	104.0782201	6.755385153	10.12463036	4.064428061	8.652508867	0.740799922	1.408901625	NA	0.170500076	0.530030104	0.039245928	0.016172509	0.010779509	GBW07267	session-4
030-7267	361554.7543	30.68037468	460800	NA	40.28418571	314.6001587	201.0828848	NA	8.47314129	NA	NA	3.331473003	NA	6.276097883	1.819897845	1855.461929	2.729683692	127.7461067	3.792175206	9.582173724	5.281091337	4.359637613	0.74620293	2.469980651	NA	0.171392879	0.457420042	0.051280182	0.015741757	0.011665623	GBW07267	session-4
032-7267	351565.9472	30.98154518	460800	NA	48.91667885	283.2328992	189.5825432	NA	NA	NA	NA	2.843929354	NA	5.718174691	1.810121087	2050.75091	2.286383373	178.5102866	4.717583428	9.555036597	5.392702129	3.909160114	0.783253321	2.720443713	NA	0.17570596	0.387381487	0.047504832	0.016493826	0.013053352	GBW07267	session-4
034-7268	506596.1457	125.4641711	295866.0606	66.99125648	106.8749289	333000	3410.526542	NA	2822.682307	37.18649814	74.85321358	10.33436532	1.392105495	54.68128814	6.322951331	3072.152722	2.404008057	127.6221939	4.154020866	17.8494048	5.192937985	6.566400708	0.740873264	4.268700536	0.536331337	0.209710058	0.624794375	0.040156123	0.012316511	0.010728098	GBW07268	session-4
036-7268	524915.4676	88.81861249	302119.1399	42.38578429	107.0607866	333000	3547.942088	NA	2243.353156	40.10508327	85.68669959	10.07194723	NA	24.95217431	4.545745386	3278.304756	2.565987338	128.1240193	4.72631144	18.80165136	7.383072495	4.834859628	0.657488466	3.715909484	0.578425342	0.208792363	0.601571099	0.043489758	0.011993178	0.010926583	GBW07268	session-4
038-7268	608525.8578	18.96773348	344964.7085	1229.924785	258.941767	333000	1440.244052	NA	2189.792381	19.06527819	92.24872286	10.79986706	NA	26.32654097	45.38913138	2765.562162	2.268305016	113.0070961	4.912788628	24.55875931	8.18968681	4.727389137	0.689259024	3.144985016	0.549949447	0.23892881	0.636171448	0.049129557	0.012653762	0.011379825	GBW07268	session-4
040-7268	512527.9335	50.49884859	303148.9337	52.6999662	130.5487671	333000	4585.670019	NA	1686.811799	44.30520398	80.16894918	9.565834087	NA	46.99282394	5.69218412	4115.222005	2.742623739	103.9168543	4.560638595	22.21757344	7.797325262	4.286852603	0.665489351	2.483903336	0.639002607	0.213693254	0.560764935	0.042963454	0.011385685	0.010261539	GBW07268	session-4
042-7268	508445.6516	30.12844035	297613.0124	35.38206289	79.40307246	333000	1841.993006	NA	1311.510505	15.61877618	77.78814083	11.18813154	1.443837399	63.424296	5.082215564	2930.390272	2.517139263	119.7365816	5.265945945	16.01789826	7.428276541	8.629207131	0.601079422	1.91230273	0.450533018	0.202751233	0.587029501	0.04164836	0.01032895	0.009772758	GBW07268	session-4
046-7270	284875.251	144.467338	24615.3426	292.1639851	NA	415.6451138	613690	273.6942323	NA	1813.296913	11.46478258	8.596856468	120.0434893	424.2110285	2.360662251	1655.717645	1.784714383	76.1098567	2.45084935	11.81327841	3.552127913	6.076822783	0.70444863	1.06715938	0.280251109	0.118411035	0.350989264	0.033122423	0.01206657	0.009727585	GBW07270	session-4
048-7270	286914.8822	141.3681149	23108.54302	288.3858709	NA	455.1948965	613690	256.617987	NA	1787.961749	15.96237676	8.344424307	119.1955653	543.3870027	3.232599124	2105.752148	1.614637403	78.53687861	2.183319292	18.38645657	4.074534276	9.991666041	0.654358133	0.927766728	0.287922422	0.12765803	0.368616794	0.034369064	0.012675527	0.009324291	GBW07270	session-4
050-7270	280651.9337	135.8762143	22552.1689	290.1945603	NA	445.0191161	613690	226.2827837	NA	1832.162703	16.36061267	7.906209081	128.0504841	594.4604473	2.514359124	1669.956104	2.465474402	57.9310198	2.837827813	5.372774795	3.769692535	9.974820687	0.629671728	0.863561117	0.297535356	0.126443159	0.409616268	0.033564391	0.014803603	0.010360924	GBW07270	session-4
052-7270	272217.2058	134.5968589	22321.04542	311.8008469	2.214752551	441.4120716	613690	206.4641069	4.073773432	1823.972276	14.65938579	7.588620796	96.92414724	568.4412161	2.270781541	1893.442997	1.854917884	75.85819721	3.170575156	-7.13787009	4.103838136	6.755544474	0.598812567	0.94914651	0.314842184	0.131274634	0.428089836	0.034505442	0.014432285	0.009357213	GBW07270	session-4
054-7270	272826.9921	141.7458003	21881.97589	332.5429062	24.44759441	575.2083447	613690	234.5175019	NA	1797.433869	14.05285876	9.461440996	119.4845863	476.2108426	1.986919362	2147.687027	1.649223589	61.26686858	3.973583316	6.502846011	3.188388179	7.910440345	0.639608855	1.093846669	0.337566359	0.148460718	0.482024212	0.032811154	0.015174149	0.009552123	GBW07270	session-4
056-7270	277051.3832	135.8276724	20462.28244	351.6288307	NA	545.6630726	613690	175.3107997	NA	1839.09722	15.30783223	8.804511346	115.2168588	483.6692774	2.328678463	1941.233479	1.957610927	90.6994813	3.077260961	12.21248944	4.300801302	7.216577404	0.508377126	1.014868941	0.331350803	0.140153691	0.454798079	0.033900105	0.014253719	0.009595789	GBW07270	session-4
110-7267_a	298551.1041	38.89512843	460800	NA	NA	481.6048597	317.189556	NA	56.48983661	NA	NA	3.24216195	NA	11.82677507	2.519591836	3913.090993	1.594035468	244.9131817	4.038835706	17.89962129	6.222276869	6.574017262	0.33886275	-0.494365189	0.569219582	0.011827306	0.65373324	0.03658609	0.017750658	0.011975765	GBW07267	session-5
112-7267_a	311209.1978	43.92622565	460800	NA	NA	293.4519065	322.8037532	NA	32.72418003	NA	NA	3.338017369	NA	10.57508912	2.11999713	2901.258489	1.760929837	218.2967425	4.339031992	34.54865389	4.688581583	6.527817257	0.696887145	-0.43947247	0.600755357	0.012589509	0.674852852	0.038956873	0.015872019	0.01209181	GBW07267	session-5
114-7267_a	280801.3793	37.15672487	460800	NA	NA	426.9590827	132.4266744	NA	26.68916573	NA	NA	2.392346053	NA	8.628447097	1.412114908	1771.554573	1.882132267	241.8529797	3.858651145	27.59250275	6.2575935	6.727766736	0.724815264	-0.44486202	0.584959934	0.012222869	0.359819572	0.038547821	0.017575797	0.013423888	GBW07267	session-5
116-7267_a	304543.3018	42.5497546	460800	NA	NA	244.3865098	234.7238074	NA	22.48156695	NA	NA	3.170348031	NA	7.616135952	1.704483574	3583.790084	2.46647031	216.6597671	2.445165662	20.92727202	6.364259903	6.320846415	0.619904734	-0.406178111	0.592293733	0.011979912	0.655918119	0.036472945	0.016707193	0.01215236	GBW07267	session-5
118-7267_a	307141.1352	53.42009323	460800	NA	NA	147.2209598	136.7843412	NA	6.092536388	NA	NA	4.016257133	NA	7.908946082	1.172727718	3036.051459	2.100382638	176.489627	3.942453058	11.14327841	6.977067413	6.508564113	0.672644632	-0.456980883	0.634834203	0.012953626	0.639856244	0.04048214	0.019612615	0.011148218	GBW07267	session-5
120-7267_a	289324.5003	32.69070379	460800	NA	51.76334517	335.5984502	186.9604693	NA	73.6327239	NA	0.371387251	3.063946986	NA	9.476908884	1.887202014	3065.53845	2.590540702	202.027116	4.595115218	14.20763134	6.696823228	6.366715356	0.963709733	-0.404484094	0.640431373	0.010591562	0.664214495	0.039817515	0.019304079	0.013455077	GBW07267	session-5
122-7268_a	367463.9308	39.8938859	432979.9593	61.80422682	NA	333000	4273.60861	NA	NA	55.34841636	84.3219602	13.64292444	NA	114.9647562	8.878550324	3426.800335	3.555513156	274.3867684	6.043817475	30.55460943	31.38893416	9.508868049	3.55485976	-0.687977409	0.789235241	0.016925455	1.106219695	0.063862329	0.023157791	0.016879496	GBW07268	session-5
124-7268_a	350551.8039	27.29010321	419608.994	42.10026776	NA	333000	2762.233652	NA	NA	28.3899606	79.71982429	13.89017841	NA	47.87079617	9.648937535	4601.136584	3.355370577	260.537637	4.309888529	42.46160935	17.39215938	19.15803836	0.78334202	-0.633558143	0.80965088	0.018474906	0.992739981	0.062830303	0.026248936	0.01618586	GBW07268	session-5
126-7268_a	350586.444	44.56685417	405354.5399	60.77502011	NA	333000	5739.093305	1.327697321	NA	62.53419252	78.71383984	13.00453865	NA	110.5949833	10.25950028	3543.791589	2.783626003	253.5350737	4.557208935	26.10975944	23.14115539	9.109595667	0.066162281	-0.62811538	0.891700101	0.017666944	0.93400899	0.061311689	0.025630161	0.016253885	GBW07268	session-5
128-7268_a	351071.7696	38.81547764	437575.4978	53.50377992	NA	333000	2709.630483	NA	NA	24.66055792	80.37885892	13.69794238	NA	93.04553149	10.85081826	4534.65853	2.84195336	157.0428864	5.692829567	28.42075814	32.07301869	9.289236712	1.105301457	-0.666092552	0.703292361	0.01885772	1.094631225	0.066442433	0.024905519	0.016285857	GBW07268	session-5
130-7268_a	369493.8623	83.62432832	442023.2701	56.30589762	NA	333000	4595.186379	NA	NA	31.87765735	79.6897925	13.67099986	NA	77.28644421	11.80852228	4016.472747	3.675806269	296.6256048	5.764836592	39.52768362	34.08583928	10.30008194	0.079541143	-0.657558202	0.909116208	0.018543361	1.036663602	0.065457449	0.026075614	0.015306271	GBW07268	session-5
132-7268_a	384403.5605	49.43445505	432208.1891	72.18606171	NA	333000	3737.997449	NA	NA	48.41718616	78.10640397	14.18181973	NA	82.43302359	8.747269261	2749.122062	2.186238002	198.3982736	5.302604456	28.94288098	37.19123825	9.861961677	1.110170894	-0.68977921	0.690400053	0.018100999	1.053535297	0.066365923	0.028145205	0.017817833	GBW07268	session-5
134-7270_a	238188.5613	183.2469485	28552.31563	585.6819019	NA	639.8353788	613690	245.3631102	65.84899908	3291.318882	22.05014492	9.502795918	115.7866087	762.5074516	3.281490602	2571.92404	2.478008974	129.8498754	4.543099419	25.4594018	4.022348642	39.88666305	0.790183751	-0.524666819	0.721664691	0.014621874	0.766804822	0.056919924	0.02038945	0.015597113	GBW07270	session-5
136-7270_a	250406.388	187.6131342	29079.26016	599.7934137	NA	726.1178171	613690	265.4233548	47.77573834	3404.498849	17.90691942	8.629156346	126.497339	440.9219162	1.918000608	2139.831629	2.361806834	186.0758753	3.6806648	27.18178512	4.040074507	95.15774212	0.832613959	-0.604172613	0.67386859	0.014589042	0.745843548	0.050796574	0.020837849	0.01367466	GBW07270	session-5
138-7270_a	247693.5667	184.8102599	27900.01916	556.1245099	NA	688.0129814	613690	212.470722	45.9004047	3643.409524	19.65152055	9.28450215	87.22786817	510.2203289	2.469268764	3916.349273	1.771540115	140.8047218	4.125217368	25.87162458	7.458036627	52.26440812	0.940493345	-0.558589301	0.733905945	0.015144847	0.874007678	0.073156347	0.021855935	0.017605005	GBW07270	session-5
140-7270_a	244999.5196	171.4111719	28308.91147	568.6953401	NA	713.9378896	613690	216.2656061	NA	3435.347759	17.95201607	8.871517845	122.7151649	517.61971	3.630324278	2813.033915	3.129197597	154.6894821	3.943985315	22.62980817	3.2355905	51.11751791	0.815409034	-0.492689629	0.631690583	0.013650594	0.841571051	0.049981964	0.018439709	0.012941251	GBW07270	session-5
142-7270_a	226328.8209	152.8201007	25742.14493	503.1658209	NA	578.2037801	613690	222.4207951	126.2028912	3202.316946	17.01845228	7.958161549	122.0147681	426.7866305	2.281526866	5217.921129	1.898948557	240.8004698	5.194867735	33.52723041	3.474950458	49.34993272	0.054290028	-0.496818251	0.608481165	0.013115619	0.840485271	0.052709456	0.021304893	0.013013126	GBW07270	session-5
144-7270_a	244178.1502	188.7085413	27116.45941	551.6278874	NA	647.1005902	613690	231.8056229	51.84016276	3198.3726	18.6082256	7.746677696	154.7281463	888.5883464	6.486703908	3728.149515	2.524833375	180.0000274	6.855421712	121.7575845	4.257969545	42.07748267	0.927077301	-0.581819955	0.775928599	0.016326755	0.829030199	0.055839267	0.022031102	0.01849871	GBW07270	session-5
020-7267_pm	303674.7061	30.19523463	460800	NA	-4.967048419	418.6751544	217.0250021	NA	176.7199634	NA	0.390304773	1.802700471	NA	8.252317447	2.296058026	3445.962595	2.767044099	242.5218832	3.468648495	-817.8439075	3.142841046	11.71318454	0.687476171	-0.460868212	0.562942949	0.010182788	0.387147118	0.043288492	0.018102757	0.010913296	GBW07267	session-6 <68µm
022-7267_pm	300794.6281	37.41017181	460800	-0.17321851	NA	507.7776531	262.127198	NA	265.8989154	NA	NA	2.37766522	1.166077708	11.60773775	2.328018574	3060.154904	3.202682619	143.013747	-4.122437722	34.36810445	5.930506372	11.28104575	0.586973435	-0.374385251	0.498928785	0.011650737	0.621275201	0.033557533	0.015182768	0.011165779	GBW07267	session-6 <68µm
024-7267_pm	298843.4053	28.6026829	460800	NA	NA	552.9408528	360.2619952	NA	211.5814947	NA	0.146810959	3.368044895	1.03096508	9.111915315	2.16200874	2922.487964	3.345067075	227.396188	2.65757265	21.13986815	6.023252152	11.82750922	0.596944154	-0.382108008	0.542312831	0.008479915	0.537868603	0.029669245	0.015423946	0.012443514	GBW07267	session-6 <68µm
026-7267_pm	305451.6055	30.93145748	460800	NA	NA	419.0099204	559.2719306	NA	267.6030155	NA	0.30415067	2.470831608	NA	7.985090412	2.311200029	4038.167962	2.933933018	231.1823931	2.280443658	36.32528976	5.935257494	9.440356384	0.606921846	-0.353368748	0.517763015	0.008922213	0.730983587	0.037434538	0.016126535	0.010053711	GBW07267	session-6 <68µm
028-7267_pm	305773.5288	27.98931406	460800	NA	NA	399.822296	206.0683001	1.508144479	NA	NA	NA	4.742267547	NA	9.891683177	1.9021099	2823.722501	2.119730409	141.6462133	15.19759503	34.82926735	5.956690133	11.26308047	-3.30599E+13	-0.175769618	0.492656442	0.162119998	0.614534692	0.030728615	0.015636949	0.009021101	GBW07267	session-6 <68µm
030-7267_pm	303458.0824	34.60403017	460800	-1.083579324	NA	370.4380691	226.149658	NA	113.8774368	NA	0.374446714	4.744079571	NA	12.46062085	2.20673933	2928.970291	3.257005888	142.4267846	-6.551500415	14.95491998	5.691611127	5.772552198	0.709151845	-0.370327529	0.49976467	0.010133879	0.675710046	0.031225779	0.016151525	0.010488759	GBW07267	session-6 <68µm
086-7267_pm	301844.5752	31.36441912	460800	NA	NA	431.338596	203.1072651	NA	60.32219729	NA	NA	2.670036989	NA	8.463519784	1.792356072	2941.923233	2.184914739	145.5781975	2.318651806	35.71934761	1.46882775	5.158414195	0.575453664	-0.459866934	0.556788976	0.009952438	0.547577599	0.037378255	0.013499218	0.010292171	GBW07267	session-6 <68µm
088-7267_pm	310193.9274	30.31193936	460800	NA	NA	367.5658023	303.0811388	NA	41.0815826	NA	NA	NA	NA	8.916719653	2.4047355	2218.059705	1.546119837	199.9933971	1.809143843	26.37413824	2.872352594	5.949553981	0.602604308	-0.349374561	0.568572269	0.012698847	1.168285345	0.037393962	0.015892495	0.011429846	GBW07267	session-6 <68µm
090-7267_pm	303857.9476	36.1770138	460800	NA	NA	506.5862916	221.1957815	NA	35.52938631	NA	NA	NA	NA	9.548636468	2.150079064	3460.812606	2.238070788	204.1367273	6.716068412	21.40152731	5.777058121	5.805950389	0.622231732	-0.363338187	0.534888081	0.011193883	0.743983793	0.033267848	0.01588095	0.01013226	GBW07267	session-6 <68µm
092-7267_pm	308632.1716	34.03605836	460800	NA	NA	496.3932385	228.2901204	NA	41.75528573	NA	NA	3.704521514	NA	7.563540416	2.420577966	3611.643843	1.324572395	236.624438	2.942677345	24.67969214	6.632763808	9.047643639	0.712406559	-0.388059048	0.560076865	0.010694171	0.504230791	0.037722613	0.015406625	0.011505146	GBW07267	session-6 <68µm
032-7268_pm	365678.0656	74.84819755	411262.1809	119.1841936	NA	333000	6439.25345	NA	NA	65.4618875	77.72955131	10.84408643	NA	133.0257209	13.78036894	4189.406943	4.394719203	211.0108405	3.225327236	47.46079331	21.21654086	7.957994808	1.162137216	-0.59191708	0.933447277	0.23640585	0.90009314	0.057921335	0.024619659	0.015113918	GBW07268	session-6 <68µm
034-7268_pm	370386.7612	79.56296668	439614.8573	84.65957096	NA	333000	4710.269712	NA	NA	28.72311488	73.01801558	11.60485217	NA	173.9351848	13.9720501	4391.610913	3.402399553	221.1041399	4.770444388	38.52614695	20.3962735	8.262045062	1.15596568	-0.662641399	0.819152079	0.016237731	0.493376913	0.036668705	0.027461942	0.014756529	GBW07268	session-6 <68µm
036-7268_pm	357445.5736	72.88104282	374766.0558	114.4047637	NA	333000	9082.899141	NA	NA	85.58043712	78.78402771	11.12591804	2.200254953	225.571939	13.63638391	4395.103392	3.896107563	320.4499859	6.423890956	51.63809078	25.01198666	12.6185811	0.993419677	-0.914314393	0.813547236	0.234531675	0.962024599	0.062748885	0.023933644	0.014956	GBW07268	session-6 <68µm
038-7268_pm	357460.0043	60.20651973	381986.5755	94.16686071	NA	333000	6928.932162	NA	NA	54.11558961	74.17867233	12.31890413	NA	152.499198	12.77423112	2813.761872	4.391044932	193.6508208	4.578402278	41.96232097	23.47660357	17.38400611	0.943300111	-0.802506402	1.543317913	0.228062559	0.448325627	0.041071544	0.022343163	0.014010415	GBW07268	session-6 <68µm
040-7268_pm	365318.2566	62.88426447	520229.2616	94.17167822	NA	333000	4565.194118	NA	NA	51.10296156	82.94846444	12.11596031	NA	138.3515671	11.1530224	5416.875336	4.024137023	245.8640717	5.765055041	36.41603372	13.48769652	18.00101159	0.916821098	-0.766466138	1.457401029	0.017289979	0.816447951	0.038667643	0.022924057	0.015902396	GBW07268	session-6 <68µm
042-7268_pm	345107.9738	93.07299222	465709.5656	82.26738775	NA	333000	7315.281072	NA	NA	88.71011312	91.33679095	12.83982253	1.661476767	168.3773761	12.98863701	5349.988665	4.078585339	244.9211405	6.334821043	22.75695445	8.852360831	18.18634961	1.130873915	-0.615791426	0.843298653	0.018527332	1.051076942	0.047383515	0.02435622	0.017637724	GBW07268	session-6 <68µm
094-7268_pm	350246.8178	83.10903847	450262.1163	83.09187017	12.59559984	333000	6178.426947	NA	NA	61.43869903	78.70450635	11.61815011	1.845286413	204.4202724	17.0352336	6878.870315	3.792990739	336.0282521	7.082964368	-53.36153314	28.01407139	10.60695426	1.293630596	-1.026940865	0.876079021	0.018314094	0.969270351	0.052625567	0.025887204	0.01943119	GBW07268	session-6 <68µm
096-7268_pm	368005.4495	68.3140401	449853.6003	87.81751701	171.4927614	333000	5943.4141	NA	NA	45.23463315	81.24324698	11.46403998	NA	139.2024594	14.79345399	7581.40575	3.573390688	322.3649584	6.51212351	37.79505465	28.19497612	13.82571215	1.059054765	-0.86194117	0.645018754	0.018379476	1.004935464	0.066772771	0.025596501	0.016543212	GBW07268	session-6 <68µm
098-7268_pm	369724.8365	85.97575272	419289.5961	110.6065197	NA	333000	10545.65121	NA	NA	114.4813808	87.67336202	11.93949882	NA	150.4049458	44.4041761	4414.681164	2.333042169	275.3527098	5.045700023	21.83420239	35.39013709	8.833532699	0.898369827	-0.694074611	0.816211404	0.018790053	0.968140269	0.048861004	0.023681201	0.017583323	GBW07268	session-6 <68µm
100-7268_pm	375557.9261	64.17085046	428348.6289	99.19898737	NA	333000	5903.370783	NA	NA	52.82126551	82.74149363	12.3075709	NA	151.6231626	14.42505055	3788.748598	3.112510164	237.1069163	5.601305609	33.04955244	25.02942231	10.3816553	0.974196494	-0.96235251	1.004267451	0.018723743	0.997380145	0.068370644	0.027880416	0.017139539	GBW07268	session-6 <68µm
044-7270_pm	243114.0347	170.0960657	24068.31214	531.4691575	NA	850.3001344	613690	233.3565121	NA	3380.136555	18.60162383	7.87383383	196.3393356	659.0159769	2.670861808	1943.207292	2.838323044	164.9654562	4.847454257	31.25142996	6.25901793	43.23982448	0.688550825	-0.448698908	0.655384567	0.012250274	0.595707345	0.043216268	0.018278822	0.010881179	GBW07270	session-6 <68µm
046-7270_pm	239066.5435	181.0701818	26379.60678	533.3634702	NA	812.8840628	613690	238.0739642	114.2948631	3085.356983	19.49993187	10.74864117	149.4306769	695.7078665	3.409063145	3056.9757	2.928666997	160.3965554	4.812241043	17.44126622	5.706157497	58.60897726	0.751506949	-0.453412782	0.606485181	0.01236507	0.719841333	0.04217719	0.016392959	0.010802186	GBW07270	session-6 <68µm
048-7270_pm	238464.0983	168.2520257	28503.8678	566.244031	NA	976.0512501	613690	226.9199512	80.68937012	3224.695027	20.27895764	9.060002138	142.3684971	619.5211751	3.787825225	4444.356076	2.899484559	215.8368574	4.540918894	33.58383523	3.165289626	93.57748863	0.770048157	-0.471200532	0.621018437	0.012312246	0.613885245	0.045097219	0.017775935	0.012002357	GBW07270	session-6 <68µm
050-7270_pm	216269.5764	190.3810712	27510.58894	477.9133526	NA	738.8986597	613690	227.4553032	90.93525267	2928.394922	15.70027289	8.112326518	169.6565487	532.9522666	2.431183927	5719.736194	3.00481663	223.3282276	4.664448644	53.56928093	6.022438918	44.98411043	0.691183538	-0.220138553	0.540215973	0.171190663	0.644880305	0.04151232	0.014117637	0.011555557	GBW07270	session-6 <68µm
052-7270_pm	254384.7427	199.1992022	28373.41653	615.7678853	NA	822.5296596	613690	237.8575284	41.99321325	3241.391321	20.62232972	8.386873822	178.1300874	592.4481542	2.404285703	3869.911794	2.886227517	230.7511188	4.46253939	40.37565467	6.586498388	77.57370849	0.745045197	-0.425312962	0.55988069	0.013034203	0.679312667	0.041963954	0.017945255	0.011427708	GBW07270	session-6 <68µm
054-7270_pm	257056.0583	195.6872446	30852.65225	600.4626357	100.6233684	914.7413783	613690	223.7774122	61.20001216	3208.081872	18.17056284	10.22245689	183.9043313	584.9408042	2.640244871	2806.351106	2.602719811	195.8107662	3.363514381	28.48086859	7.02092775	47.99088964	0.723205506	-0.453908901	0.595669086	0.01177838	0.694046951	0.046807351	0.018677029	0.010756445	GBW07270	session-6 <68µm
102-7270_pm	237544.9128	180.0180626	29274.51025	545.2646346	NA	963.030744	613690	248.6388744	124.8084605	3069.677671	17.79699893	12.64853703	158.9725079	639.6019413	4.134285797	5011.335943	3.610585718	203.7106783	3.095499813	45.82706841	5.905477128	40.86817432	0.739225338	-0.526120416	0.624965734	0.19183166	0.773296918	0.04720834	0.016345422	0.010718239	GBW07270	session-6 <68µm
104-7270_pm	261888.6622	195.9982965	30869.23053	632.9731229	NA	880.7877785	613690	253.4789435	130.0263531	3070.442688	17.74836895	9.895266549	163.9809733	749.3002618	3.355359482	3635.318054	2.57346584	150.6986631	4.987639192	26.13045295	3.099160087	81.64087186	0.752144307	-0.470676362	0.643517714	0.012631171	0.699901729	0.047219455	0.019792956	0.013669845	GBW07270	session-6 <68µm
106-7270_pm	238603.7753	174.2709295	27917.03795	549.6503118	NA	1207.020736	613690	224.2678051	124.489561	3350.802476	18.59180148	11.6455049	135.670243	630.4254365	3.311027336	3198.318553	2.531138859	185.0688024	4.273728934	23.82776351	4.938014346	63.19863798	0.742442852	-0.655291391	0.624203597	0.012046225	0.760577616	0.043952519	0.017835575	0.013489235	GBW07270	session-6 <68µm
108-7270_pm	261530.9841	176.896027	30751.0165	606.1683417	NA	850.8575443	613690	238.2176215	94.55817449	3155.794767	18.35488138	9.61472731	204.7068107	1107.369916	4.247238561	2040.401932	2.507370377	106.6160803	2.728831854	17.35205841	3.027828539	96.97201087	0.685470984	-0.454073522	0.584056905	0.012461139	0.721500326	0.041676929	0.01858841	0.013458084	GBW07270	session-6 <68µm
7267_raster_1	387024.0969	29.4018741	460800	9.712110239	29.47559964	338.8201788	NA	1.910827633	6.497119	31.29941878	0.135791916	0.581953263	1.470251666	26.09726993	1.604425737	1141.503405	0.261449436	18.14654957	0.07461099	0.650310477	0.799115631	1.010183551	0.017759579	0.030493941	0.205302706	0.003786572	0.055585772	0.075374147	0.009994521	0.006389855	GBW07267	session-ns1
7267_raster_2	400625.6275	24.63628787	460800	7.487882654	24.30843162	257.8719311	NA	2.228530301	0.608204691	40.74895137	0.10549758	0.830819382	1.561415567	22.57857913	1.595382472	1041.440806	0.197430198	16.75469413	0.058583758	1.216787447	0.796520596	0.762916527	0.089571315	0.031857311	0.79307052	0.005787848	0.07612384	0.140079157	0.035614673	0.007290616	GBW07267	session-ns1
7268_raster_1	381128.1738	27.61821675	252343.0344	46.11922298	30.7377378	333000	4227.372254	NA	185.0816165	46.22200686	58.54621757	5.374086184	NA	187.970647	9.765834039	2248.48569	0.822659992	35.83325972	0.131180854	2.139960599	2.734197153	3.305321935	0.152740857	0.09105497	0.632146215	0.011893145	0.470710433	0.414555409	0.026392652	0.016693009	GBW07268	session-ns1
7268_raster_2	375444.6074	18.71547919	259089.2246	32.12421479	20.58876018	333000	1716.137967	NA	206.3105434	25.15089573	60.04124626	5.091170667	NA	80.0070629	7.880774573	2721.523238	0.752935296	54.5480827	0.267487963	2.040031688	2.132485439	2.627377233	0.050362825	0.092761395	0.691316128	0.012829027	0.182199072	0.149449611	0.032440301	0.018833965	GBW07268	session-ns1
7270_raster_1	243834.8986	147.2701472	18820.51543	404.9985217	NA	723.443875	613690	152.9652304	5.576901828	2747.738374	11.5965472	1.433313981	39.19065956	445.6450232	5.845578918	961.5345275	0.217541112	11.48740514	0.071824916	0.563417553	0.820437033	1.473980908	0.042768341	0.01248717	0.221404917	0.003634877	0.050963207	0.094071736	0.035653891	0.005103354	GBW07270	session-ns1
7270_raster_2	221218.4002	149.1205881	20886.08052	377.6445476	NA	1435.819051	613690	150.1478731	7.105251244	2838.465188	13.13981054	1.668258064	38.46514048	433.078286	5.355046821	1265.82223	0.225408868	18.96403149	0.094758913	0.776738914	0.591481745	2.128882715	0.021533237	0.028346514	0.290774167	0.005219677	0.1731548	0.091341257	0.010018383	0.007056187	GBW07270	session-ns1
7267_old_1	451757.5334	21.38761485	460800	5.296580676	21.72737779	227.3519561	NA	1.386335827	3.318322393	27.8316774	0.129638745	0.39700986	1.417109658	16.9294515	1.342505815	1483.336868	0.196558658	14.21685673	0.089982963	0.706845964	0.558648129	0.738537754	0.012824508	0.02602594	0.1930717	0.003597922	0.084427454	0.063010838	0.008695582	0.005731114	GBW07267	session-ns2
7267_old_2	386817.6307	20.24973719	460800	7.192774353	24.43419738	226.8269115	NA	1.671825979	3.932999651	34.20944055	0.123677264	0.31727495	1.634099605	20.34551024	1.704350352	894.4535687	0.163653812	10.58934683	0.067024838	0.461654702	0.478076563	0.236292597	0.011060683	0.022688685	0.16458646	0.003273322	0.054016431	0.282776519	0.023548494	0.032013956	GBW07267	session-ns2
7268_old_1	507682.8089	11.29614357	295472.4879	32.93099684	26.02811437	333000	1314.438435	NA	267.4657428	25.67712043	51.9110343	4.431162838	NA	28.6363116	7.453687043	3721.194779	0.723104078	43.21178387	0.338854769	2.168976775	1.118336674	2.303035547	0.045099118	0.12488793	0.695440731	0.013571485	0.547537997	0.193447975	0.134429193	0.0201844	GBW07268	session-ns2
7268_old_2	433571.1522	19.73235997	300522.7882	28.31241768	25.61107071	333000	2829.741928	NA	292.9134628	34.45404505	54.84759639	6.574938905	0.60681293	101.3028328	8.198740815	3884.40892	0.564250453	37.04715482	0.20229492	2.141157421	1.975719746	2.355907812	0.130233695	0.175480678	0.621194821	0.014181558	0.19948543	0.166553914	0.099164775	0.017053537	GBW07268	session-ns2
7270_old_1	288927.9042	175.9424984	18723.81573	368.7355351	NA	904.5604861	613690	164.4153491	7.812092504	2086.916414	13.51775202	1.353637312	49.89789954	761.1636985	8.404356582	762.1638645	0.219777129	13.81742615	0.053505473	0.474428315	0.551607589	1.333121448	0.012875742	0.030516402	0.143079244	0.003485588	0.064388785	0.172219721	0.031780325	0.004652277	GBW07270	session-ns2
7270_old_2	263450.3457	165.5946672	17409.8427	379.0427125	NA	725.1727155	613690	164.262314	4.927243425	2299.099115	11.48007987	1.537801373	52.85902507	617.7658269	7.659995976	767.3372264	0.230404093	11.50087758	0.082359302	1.010861251	0.424616497	1.187288676	0.040082622	0.0330266	0.154420126	0.003407045	0.062417648	0.075581667	0.008698149	0.005815803	GBW07270	session-ns2
7267_new_1	367714.0615	16.54959019	460800	0.889247037	14.78475468	108.5476482	52.67092461	NA	NA	NA	NA	NA	0.099524716	4.585947855	0.841385478	963.2879824	0.225173432	16.40433291	0.093051621	1.046867361	0.379260445	0.933195223	0.013078624	0.016186738	0.1627674	0.012337408	0.051024291	0.028425067	0.0076291	0.005270874	GBW07267	session-ns3
7267_new_2	452718.1308	15.24813147	460800	2.018569932	11.57900981	65.53614734	40.62987584	NA	0.065433479	NA	NA	NA	NA	1.586920217	0.702164673	1097.771143	0.22973237	16.01955072	0.107057662	0.853675882	0.289092207	0.870524869	0.015489507	0.013747456	0.654803845	0.004436173	0.081572982	0.04818177	0.04026358	0.006339313	GBW07267	session-ns3
7268_new_1	466009.5631	13.47007453	267810.0953	30.01537309	26.78975623	333000	1511.150828	NA	301.7162897	15.41520879	61.65558604	5.811307811	NA	71.46048142	7.05892275	4029.124575	0.814996107	80.1384152	0.207001796	3.541394853	0.929589017	3.098193085	0.17865361	0.133783877	0.834126983	0.015941863	0.565393185	0.171533438	0.179692741	0.025452252	GBW07268	session-ns3
7268_new_2	459592.4392	10.89701138	298947.9806	33.60521533	23.85877331	333000	1038.698695	NA	297.4340055	15.77195033	64.87471132	5.493048568	NA	58.09325431	5.365221485	3901.426853	0.569279139	66.36675559	0.349650453	4.393214369	1.790346371	2.624024425	0.058089212	0.14576022	0.836369204	0.017440243	0.331863524	0.176035833	0.13661545	0.02585254	GBW07268	session-ns3
7270_new_1	240966.2709	92.51459759	11577.95941	251.6580796	NA	153.1434702	613690	179.6862054	0.282007864	2328.283826	5.919298462	1.177704393	4.969706064	15.31177699	0.198557352	999.7619205	0.170031442	11.36604339	0.0561697	0.624607581	0.450594955	1.300401736	0.013422261	0.023443577	0.143626514	0.003538577	0.095955062	0.011970185	0.008266575	0.005257274	GBW07270	session-ns3
7270_new_2	249793.4577	90.42765256	14172.55568	317.0296135	NA	223.1048735	613690	173.8666938	0.324590092	2084.728099	3.239331897	0.676937993	7.19102426	25.74853202	0.263465223	1026.984688	0.237678357	21.02178447	0.080137712	0.815501916	0.342330999	1.206341914	0.013727718	0.046158943	0.170322514	0.012790972	0.135800636	0.014983538	0.012216018	0.022384369	GBW07270	session-ns3
